# Supplementary material for: A rapidly recoverable shape memory polymer with a topologically well-controlled poly(ethyl methacrylate) structure
Source: Royal Society of Chemistry journal article supplement (doi:10.1039/c8sm01404c), 2018-01-01
Supplement: c8sm01404c1.pdf [file c8sm01404c1.pdf]

## Supporting Information

### **A Rapid Recoverable Shape Memory Polymer with Topologically Well-controlled Poly(ethyl methacrylate) Structures**

Jingjuan Lai,<sup>ab</sup> Xingjian Li,<sup>ab</sup> Ruiqing Wu,<sup>ab</sup> Jinni Deng,<sup>a</sup> Yi Pan,<sup>a</sup> Zhaohui Zheng<sup>a</sup>  
and Xiaobin Ding<sup>\*a</sup>

<sup>a</sup> Chengdu Institute of Organic Chemistry, Chinese Academy of Sciences, Chengdu, 610041, China.

<sup>b</sup> University of Chinese Academy of Sciences, Beijing, 100081, China.

\* Correspondence and requests for materials should be addressed to X.D. (email: [xbding@cioc.ac.cn](mailto:xbding@cioc.ac.cn)).

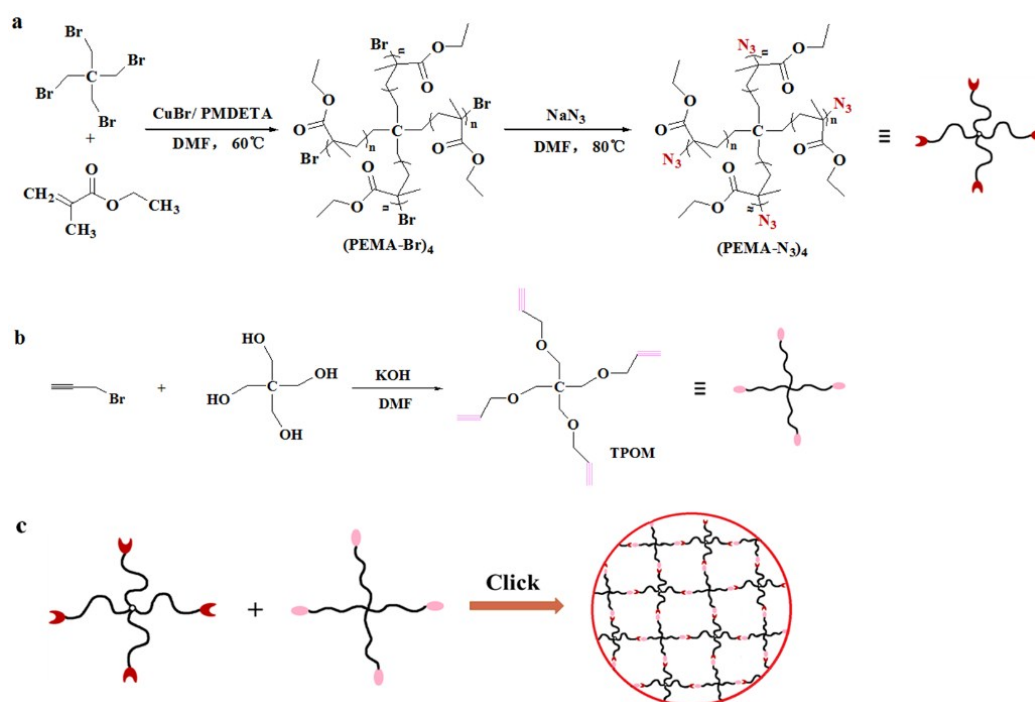

**Figure S1.** The specific synthesis route of well-controlled shape memory polymer (PEMA)<sub>4</sub>-TPOM by ATRP and CuAAC reaction

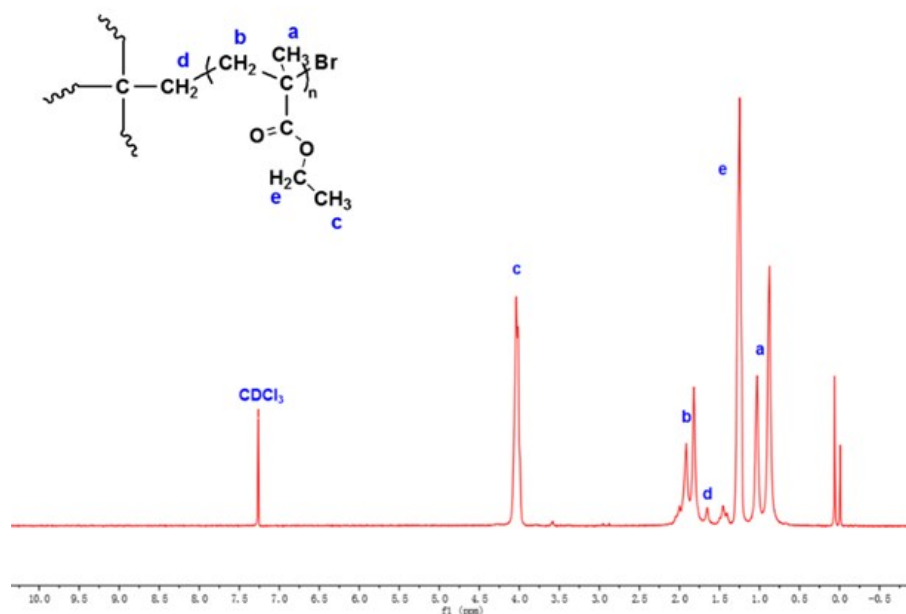

**Figure S2.** The <sup>1</sup>H-NMR of tetra-arm (PEMA-Br)<sub>4</sub>

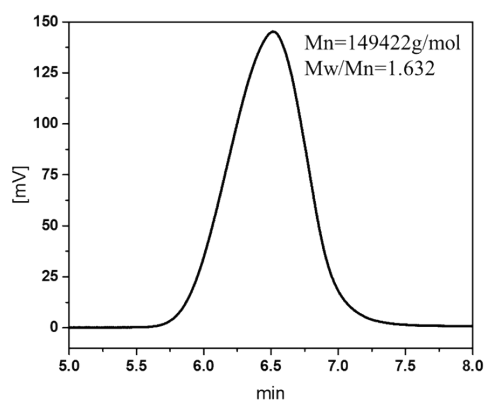

**Figure S3.** The GPC trace of well-controlled tetra-arm (PEMA-Br)<sub>4</sub> polymer monomer

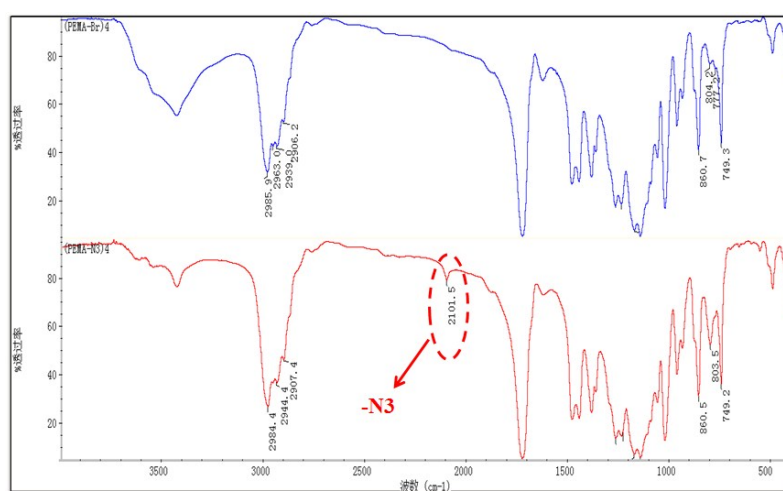

**Figure S4.** Compared with the FT-IR spectra of four arm (PEMA-Br)<sub>4</sub> before and after modification

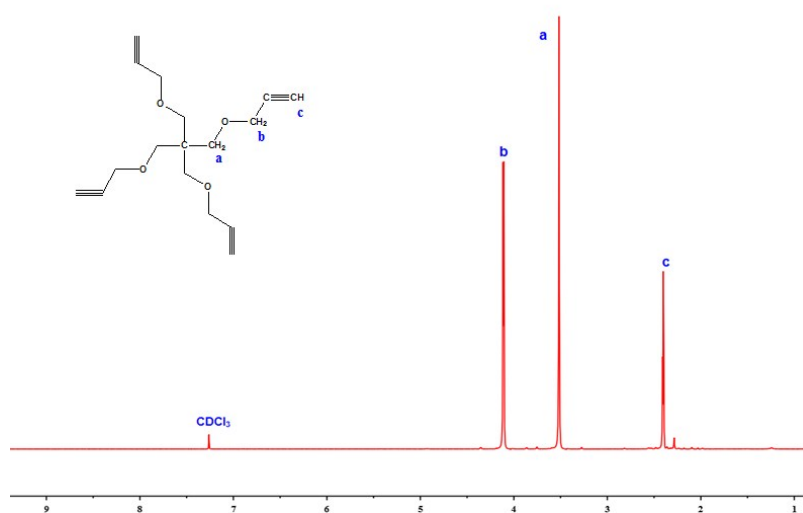

**Figure S5.** The <sup>1</sup>H NMR spectrum of TPOM

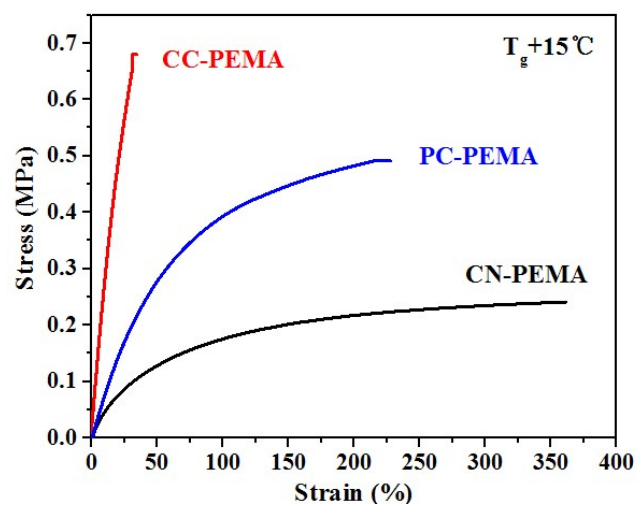

**Figure S6.** Tensile stress-strain curves obtained by DMA for CN-PEMA, CC-PEMA and PC-PEMA samples

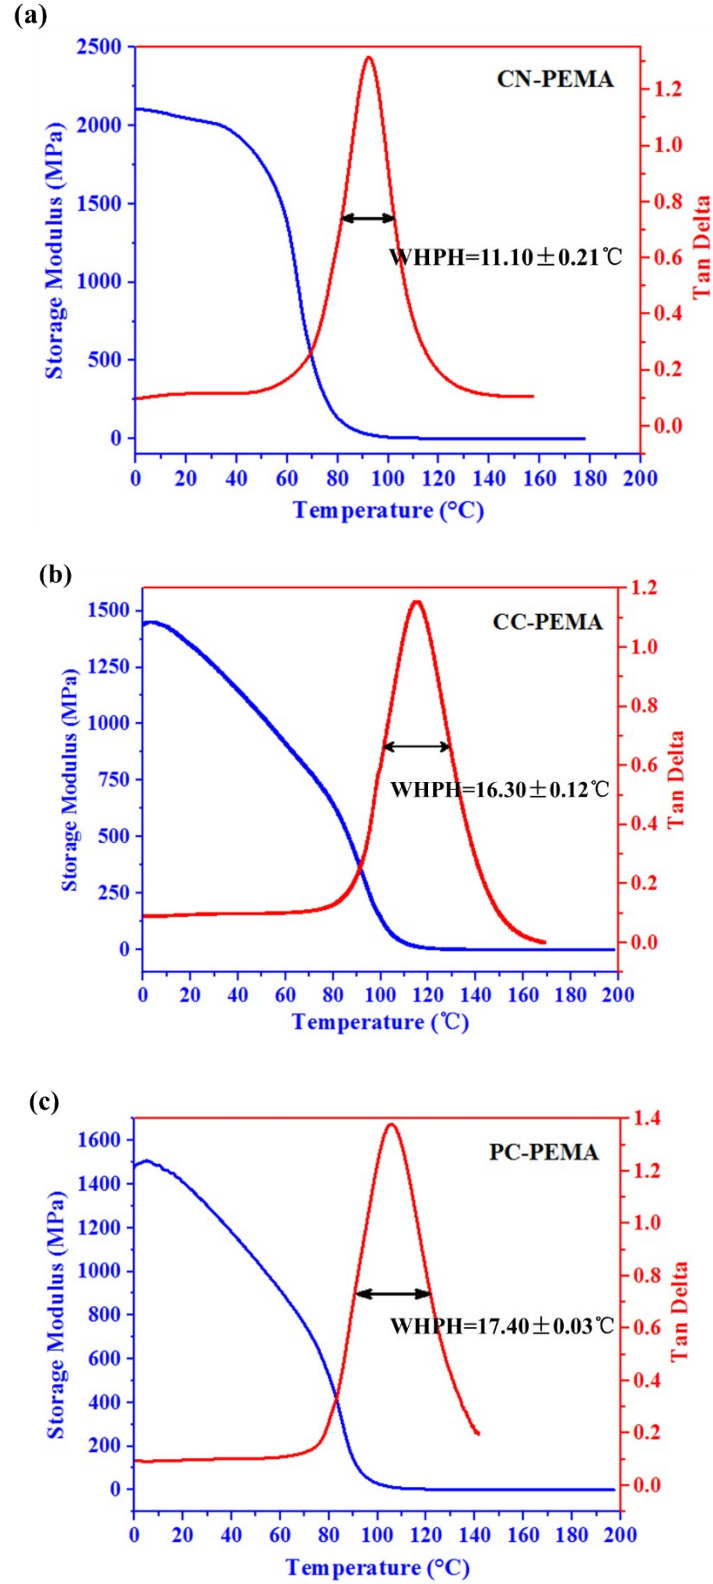

**Figure S7.** The storage modulus ( $E'$ ) and loss angle ( $\tan \delta$ ) for (a) CN-PEMA, (b) CC-PEMA and (c) PC-PEMA

**Table S1.** The WHPH and reference of various acrylate-based SMPs

| Number                                                        | Polymer systems                                       | WHPH(°C)  | Reference    |
|---------------------------------------------------------------|-------------------------------------------------------|-----------|--------------|
| <b>Copper(I)-catalyzed azide-alkyne cycloaddition network</b> |                                                       |           |              |
| (a)                                                           | CN-PEMA-SMP                                           | 11.3      | In this work |
| <b>Conventional cross-linked networks</b>                     |                                                       |           |              |
| (b)                                                           | CC-PEMA-SMP                                           | 16.4      | In this work |
| (c)                                                           | PC-PEMA-SMP                                           | 17.4      | In this work |
| <b>AB copolymer networks</b>                                  |                                                       |           |              |
| (d)                                                           | MMA-co-PEGDMA                                         | 22.5-26.3 | 29           |
| (e)                                                           | MMA-co-poly(ethylene glycol) dimethacrylate           | 34-38     | 30           |
| (f)                                                           | PMMA-poly( $\epsilon$ -caprolactone) (40%) co-network | 33        | 31           |
| (g)                                                           | PMMA/poly(L-lactide) (50%)                            | 24        | 32           |
| <b>Semi-IPNs</b>                                              |                                                       |           |              |
| (h)                                                           | PMMA/PEG (35%) semi-IPNs                              | 28-32     | 30           |
| (i)                                                           | Poly[MMA-co-(N-vinyl-2-pyrrolidone)]/PEG              | 31        | 33           |
| (j)                                                           | PMMA/SPEG semi-IPNs                                   | 31-55     | 23           |
| (k)                                                           | PMMA-PEG semi-IPN                                     | 38.5      | 34           |

**Table S2.** Measured shape memory property parameters from six shape memory cycles for CN-PEMA sample with the deformation strain of over 30% after removing heat history

| Cycle | $\epsilon_n$ (%) | $\epsilon_m$ (%) | $\epsilon_u$ (%) | $\epsilon_p$ (%) | $R_f$ (%) | $R_r$ | $V_r$ (% °C <sup>-1</sup> ) |
|-------|------------------|------------------|------------------|------------------|-----------|-------|-----------------------------|
| 1st   | 0.288            | 35.7             | 34.72            | 1.692            | 97.23     | 95.92 | 9.79                        |
| 2nd   | 1.692            | 36.18            | 35.22            | 3.03             | 97.22     | 96.01 | 10.84                       |
| 3rd   | 3.03             | 36.73            | 35.72            | 4.031            | 97.00     | 96.94 | 12.14                       |
| 4th   | 4.031            | 36.62            | 35.71            | 4.705            | 97.21     | 97.87 | 12.44                       |
| 5th   | 4.705            | 36.51            | 35.7             | 5.157            | 97.45     | 98.54 | 12.56                       |
| 6th   | 5.157            | 36.44            | 35.7             | 5.626            | 97.63     | 98.46 | 12.58                       |

**Table S3.** Measured shape memory property parameters from three shape memory cycles for CC-PEMA sample with the deformation strain of over 30% after removing heat history

| Cycle | $\epsilon_n$ (%) | $\epsilon_m$ (%) | $\epsilon_u$ (%) | $\epsilon_p$ (%) | $R_f$ (%) | $R_r$ | $V_r$ (% °C <sup>-1</sup> ) |
|-------|------------------|------------------|------------------|------------------|-----------|-------|-----------------------------|
| 1st   | 0.118            | 31.21            | 30.56            | 2.087            | 97.91     | 93.53 | 6.94                        |
| 2nd   | 2.087            | 32               | 31.23            | 2.893            | 97.43     | 97.23 | 7.23                        |
| 3rd   | 2.893            | 33.04            | 32.22            | 3.897            | 97.28     | 96.58 | 7.55                        |

**Table S4.** Measured shape memory property parameters from three shape memory cycles for PC-PEMA sample with the deformation strain of over 30% after removing heat history

| Cycle | $\epsilon_n$ (%) | $\epsilon_m$ (%) | $\epsilon_u$ (%) | $\epsilon_p$ (%) | $R_f$ (%) | $R_r$ | $V_r$ (% °C <sup>-1</sup> ) |
|-------|------------------|------------------|------------------|------------------|-----------|-------|-----------------------------|
| 1st   | 0.393            | 34.94            | 31.57            | 1.681            | 90.25     | 95.87 | 5.55                        |
| 2nd   | 1.681            | 34.65            | 31.58            | 2.972            | 90.69     | 95.68 | 5.62                        |
| 3rd   | 2.972            | 34.84            | 31.65            | 4.16             | 89.99     | 95.86 | 5.86                        |
